# Supplementary material for: Strategies to control HIV and HCV in methadone maintenance treatment in Guangdong Province, China: a system dynamic modeling study
Source: Subst Abuse Treat Prev Policy. 2018 Jan 10;13:1. doi: 10.1186/s13011-017-0140-3 (PMC5763976; doi:10.1186/s13011-017-0140-3)
Supplement: Additional file 1: Figure S1a. — Causal diagram of MMT clinics, participants and detoxification centers. Figure S1b. Causal diagram of HIV/HCV transmission. Figure S1c. HIV testing and treatment systems causal diagram. Figure S1d. Causal diagrams of HIV and HCV testing and treatment systems. Figure S2a. Stock and flow diagram of MMT clinics, participants and detoxification centers. Figure S2b. Stock and flow diagram of HIV and HCV testing and treatment systems. Figure S2c. Stock and flow diagram of HIV transmission system. Figure S2d. Stock and flow diagram of HCV transmission system. Table S1. Parameters of MMT dynamic model. Table S2. System dynamic equations of the MMT system dynamic model. Table S3. Effectiveness of health education, psychological counseling, contingency management, needle exchange program, condom promotion, ART and HCV treatment. (PDF 1349 kb) [file 13011_2017_140_MOESM1_ESM.pdf]

## *Supplementary material*

### **1. Descriptions of causal loops of the MMT system**

Causal loop diagrams describe the relationships and feedback loops of the factors in a complex dynamic system. The causal loops diagram consists of positive or negative feedback loops or chains.

#### **(1) Description of MMT clinics, detoxification centers and MMT system participants**

The establishment of new MMT clinics was one of the most important factors that decided the number of new MMT participants. Drug users with the intent and motivation for treatment would participate in the MMT program, thus increasing the number of MMT participants. MMT participants tend to be less satisfied as the number of people on MMT increase, resulting in drop-outs and decreased numbers of MMT participants. Recycling forms a negative causal loop (B) that decreases the numbers of MMT participants whereas drop-outs may be re-enrolled in the MMT program after a certain period of time (average of about 6 months)<sup>1</sup>. This positive causal loop also increases the number of MMT participants (R1). Other reasons that may cause participants to drop out of the MMT system in China include time, cost, distance to the MMT clinic, misconceptions about MMT, doses and concurrent drug use behaviors<sup>2-4</sup>. MMT participants use drugs and drop out of the program, and several studies have documented the phenomenon of arrests of drug users who are on MMT<sup>5,6</sup>. Those who are arrested are required to enter a detoxification center and are released after two years of detoxification. Some of them re-enroll in MMT through the referral of the center (R2). These causal loops describe the dynamics of the participants in the MMT program (Figure S1a).

域代码已更改

域代码已更改

域代码已更改

域代码已更改



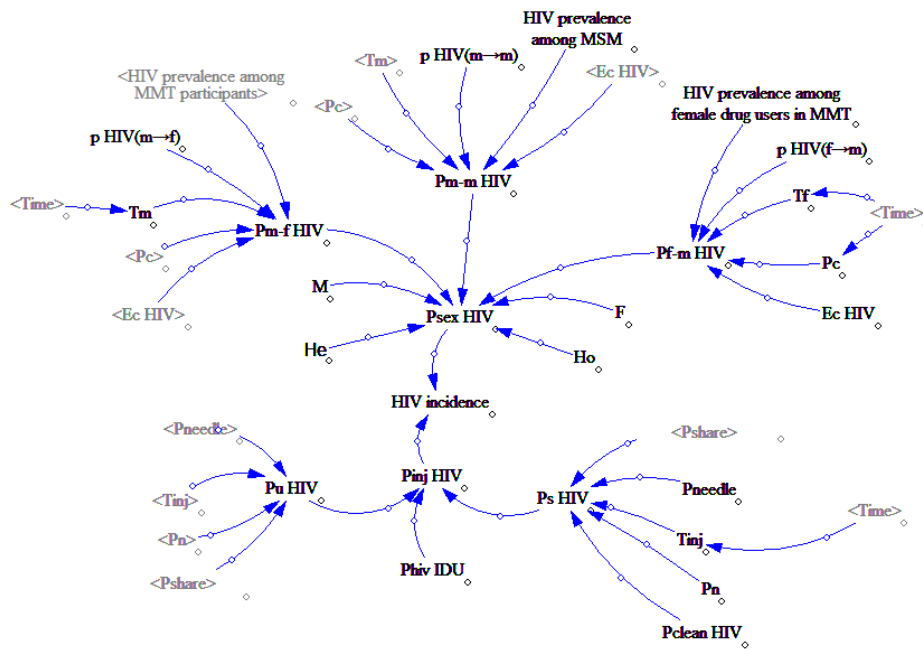

Figure S1b. Causal diagram of HIV/HCV transmission.

The probability of HIV transmission from a positive female to a negative male through sexual intercourse is:

$$p_{f-mHIV} = \left\{ 1 - \left( 1 - p_{HIV(f \rightarrow m)} \right)^{T_f \times P_c} \times \left( 1 - (1 - E_cHIV) \times p_{(f \rightarrow m)} \right)^{T_f \times P_c} \right\} \\ \times \text{HIV prevalence among female drug users in MMT}$$

While the probability of HIV transmission from a positive male to a negative female through sexual intercourse is:

$$p_{m-fHIV} = \left\{ 1 - \left( 1 - p_{HIV(m \rightarrow f)} \right)^{T_m \times P_c} \times \left( 1 - (1 - E_cHIV) \times p_{(m \rightarrow f)} \right)^{T_m \times P_c} \right\} \\ \times \text{HIV prevalence among MMT participants}$$

The probability of HIV transmission from a positive male to a negative male through sexual intercourse is:

$$p_{m \rightarrow m} HIV = \left\{ 1 - \left( 1 - p_{HIV(m \rightarrow m)} \right)^{T_m \times P_c} \times \left( 1 - (1 - E_{cHIV}) \times p_{(m \rightarrow m)} \right)^{T_m \times P_c} \right\} \\ \times HIV \text{ prevalence among MSM}$$

$p_{HIV(f \rightarrow m)}$ : the infectivity of HIV from a positive female to a negative male;

$T_f$ : the number of sexual encounters among female drug users each year;

$P_c$ : the proportion of unprotected sexual intercourse;

$E_c HIV$ : the effectiveness of condoms in protecting from HIV/HCV transmission;

$p_{HIV(m \rightarrow f)}$ : the infectivity of HIV/HCV from a positive male to a negative female;

$T_m$ : the number of sexual encounters among male drug users each year;

Then, the probability of HIV/HCV transmission through sexual behaviors is:

$$P_{sex} HIV = P_{m \rightarrow f} HIV \times F \times H_e + P_{m \rightarrow m} HIV \times M \times H_o + P_{f \rightarrow m} HIV \times M$$

$F$ : the proportion of females on MMT;

$M$ : the proportion of males on MMT;

$H_e$ : the proportion of heterosexuality among male participants;

$H_o$ : the proportion of homosexuality among male participants;

The probability of HIV/HCV transmission through sterilized needles/syringes is:

$$P_s HIV = 1 - [1 - P_{needle} \times (1 - P_{clean} HIV)]^{P_n \times T_{inj} \times P_{share}}$$

While the probability of HIV/HCV transmission through unsterilized needle/syringes is:

$$P_u HIV = 1 - [1 - P_{needle}]^{(1 - P_n) \times T_{inj} \times P_{share}}$$

$P_{needle}$ : the probability of HIV/HCV transmission per injection;

$P_{clean} HIV$ : the probability of successful sterilization;

$P_n$ : the proportion of sterilized needles/syringes;

$T_{inj}$ : the number of injections each year;

$P_{share}$ : the proportion of shared needles/syringes.

Then, the probability of HIV/HCV transmission through injection behaviors is:

$$P_{inj} HIV = [1 - (1 - P_s HIV) \times (1 - P_u HIV)] \times P_{hiv IDU}$$

$P_{hiv IDU}$ : the prevalence of HIV/HCV among injection drug users.

The HIV/HCV incidence is therefore calculated as:  $HIV\ incidence = 1 - (1 - P_{sex\ HIV}) \times (1 - P_{inj\ HIV})$ .

The HCV transmission process is similar with HIV transmission process.

### (3) Description of testing and treatment systems

The HIV/HCV testing and treatment systems describe the progression from undiagnosed to treatment or death. HIV-infected MMT participants receive testing in MMT clinics every year. Some of the diagnosed HIV-infected individuals receive treatment. However, the proportion of drop-outs among antiretroviral therapy patients who are receiving MMT is high. A proportion of the patients die after a period of time (Figure S1c). HCV-infected MMT participants undergo a similar process including undiagnosed, diagnosed and on treatment. Unlike HIV, HCV can be cured after completion of treatment, and a small percentage of infections can be spontaneously cleared by the human immune system (Figure S1d).

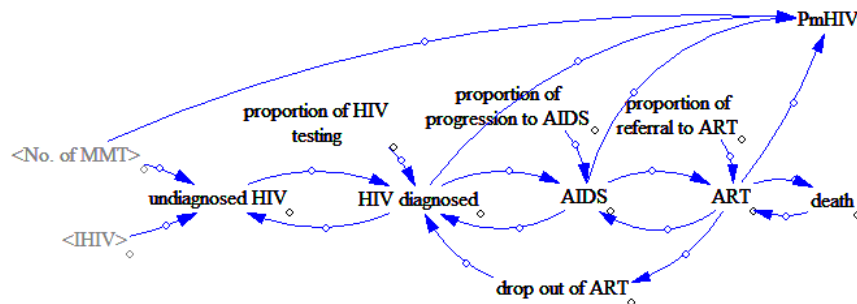

Figure S1c. HIV testing and treatment systems causal diagram

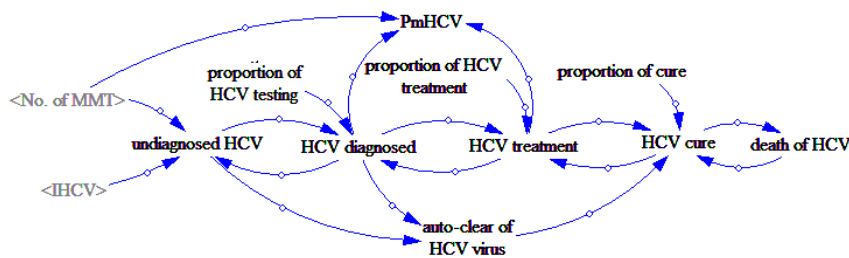

Figure S1d. Causal diagrams of HIV and HCV testing and treatment systems.

## 2. Stock and flow diagram of MMT-SDM

Based on the causal loops, we further created stock and flow diagram of MMT-SDM. A rectangle represents the stock in system dynamics model. We use black arrows to indicate the inflow in and outflow of the stock variable. Blue arrows are showing the causal relations between auxiliary variables or impact of constant variable on auxiliary/flow variables.

In this model, “MMT CLINIC”, “MMT RETENTION”, “DC CENTER”, “UNDISAGNOSED HIV/HCV”, “DIAGNOSED HIV/HCV”, “AIDS”, “ART”, “CURE FOR HCV”, and “HCV CLEARANCE” are stock variables that represent the numbers of individuals stocked at this stage in system dynamic model. Flow variables (new enrollment, re-enrollment etc.) indicate the change of number of individuals within a certain time limit. Auxiliary variables are mediate variables, which express the information transformation between flows and stocks. Constant variables are constant within the study period (Figure S2a-d).



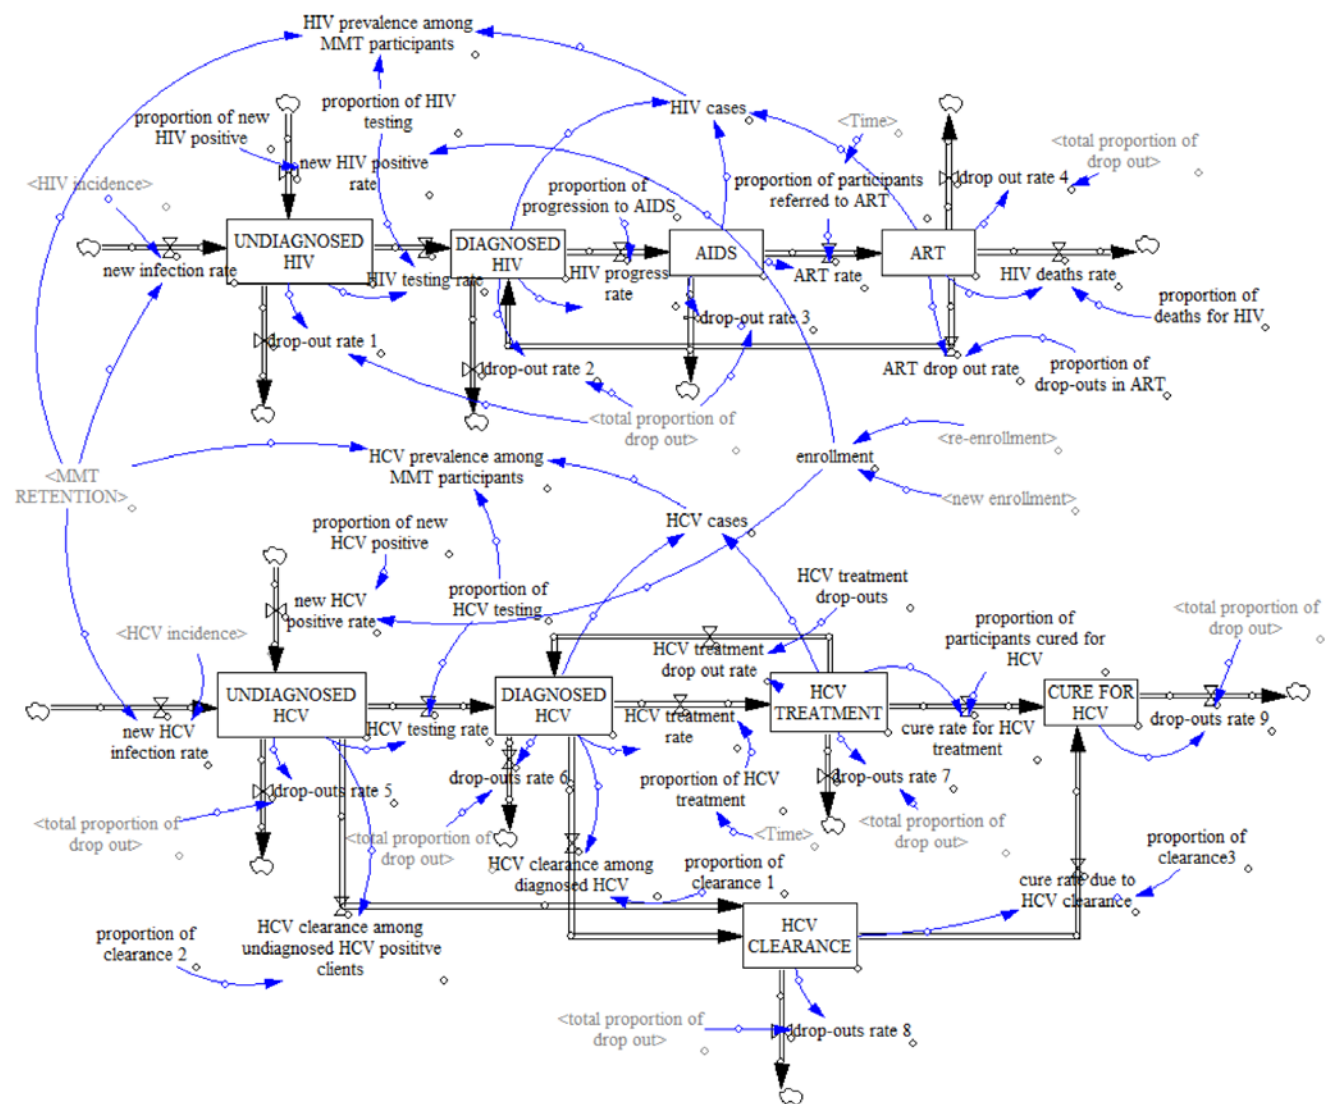

Figure S2b. Stock and flow diagram of HIV and HCV testing and treatment systems.

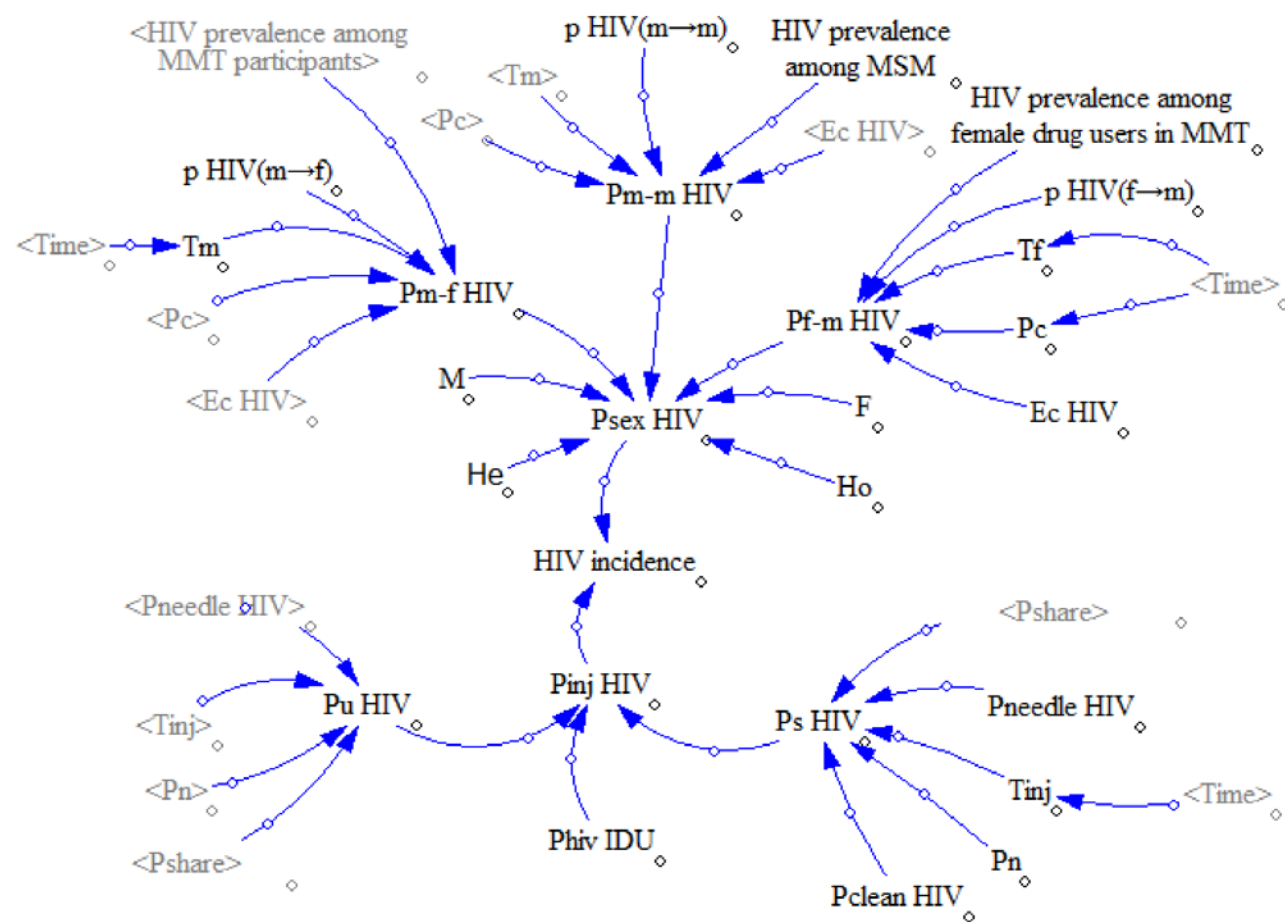

Figure S2c. Stock and flow diagram of HIV transmission system.

**Figure S2d. Stock and flow diagram of HCV transmission system.**

### 3. Parameter collection

Table S1 parameters of MMT dynamic model

| No | Parameter in model                                           | Description                                                               | Estimates                    | Lower value                  | Higher value                 | Sources/References             |
|----|--------------------------------------------------------------|---------------------------------------------------------------------------|------------------------------|------------------------------|------------------------------|--------------------------------|
| 1  | daily cost of MMT                                            | daily cost of MMT ( <u>RMB</u> )                                          | 20                           | 15                           | 25                           | CS <sup>2</sup>                |
| 2  | distance to MMT                                              | distance to MMT ( <u>kilometer</u> )                                      | 5                            | 3.75                         | 6.25                         | CS <sup>2</sup>                |
| 3  | Misconception_                                               | misconception ( <u>%</u> )                                                | <del>0.98</del>              | <del>0.50</del> <sub>6</sub> | <del>0.98</del> <sub>2</sub> | CS <sup>3</sup>                |
| 4  | daily dosage of methadone                                    | daily dosage of methadone ( <u>ml</u> )                                   | 50                           | 28.5                         | 74.7                         | CS,literatures <sup>7, 8</sup> |
| 5  | proportion of injection among MMT participants who use drugs | proportion of injection among MMT participants who use drugs ( <u>%</u> ) | <del>0.60</del>              | <del>0.49</del>              | <del>0.80</del>              | Chort,Meta <sup>9, 10</sup>    |
| 6  | proportion of drug use among MMT participants                | proportion of drug use among MMT participants ( <u>%</u> )                | <del>0.20</del>              | <del>0.15</del> <sub>7</sub> | <del>0.33</del> <sub>5</sub> | Cohort,Meta <sup>9-11</sup>    |
| 7  | proportion of needle sharing among injecting drug users      | proportion of needle sharing among injecting drug users ( <u>%</u> )      | <del>0.30</del>              | <del>0.25</del>              | <del>0.35</del>              | Cohort,Meta <sup>9</sup>       |
| 8  | proportion of successful detoxification                      | proportion of successful detoxification ( <u>%</u> )                      | <del>0.00</del> <sub>1</sub> | <del>0.00</del> <sub>1</sub> | <del>0.00</del> <sub>3</sub> | Literatures <sup>12</sup>      |

|    |                                                                                   |                                                                                       |                 |                 |                 |                               |
|----|-----------------------------------------------------------------------------------|---------------------------------------------------------------------------------------|-----------------|-----------------|-----------------|-------------------------------|
| 9  | number of new drug users who have the intention to treat in MMT                   | number of new drug users who have the intention to treat in MMT                       | 600             | 450             | 750             | consult                       |
| 10 | arrest among drug users                                                           | proportion of drug users being arrested (%)                                           | <del>0.20</del> | <del>0.15</del> | <del>0.25</del> | Meta <sup>11</sup>            |
| 11 | <del>p</del> Proportion of individuals referred from detoxification center to MMT | <del>P</del> proportion of individuals referred from detoxification center to MMT (%) | <del>0.20</del> | <del>0.15</del> | <del>0.26</del> | literatures,consult<br>13, 14 |
| 12 | p HIV(m→f)                                                                        | HIV infectivity from positive male to negative female                                 | 0.00124         | 0.0001          | 0.0014          | literatures <sup>15</sup>     |
| 13 | p HIV(f→m)                                                                        | HIV infectivity from positive female to negative male                                 | 0.00377         | 0.0013          | 0.011           | literatures <sup>15</sup>     |
| 14 | p HIV(m→m)                                                                        | HIV infectivity from positive male to negative male                                   | 0.014           | 0.002           | 0.025           | literature <sup>16</sup>      |
| 15 | p HCV(m→f)                                                                        | HCV infectivity from positive male to negative female                                 | 0.00125         | 0               | 0.03            | literatures <sup>17, 18</sup> |
| 16 | p HCV(f→m)                                                                        | HCV infectivity from positive female to negative male                                 | 0.00125         | 0               | 0.03            | literatures <sup>17, 18</sup> |
| 17 | p HCV(m→m)                                                                        | HCV infectivity from positive male to negative male                                   | 0.0014          | 0               | 0.066           | literatures <sup>19</sup>     |
| 18 | Tm                                                                                | the number of sexual intercourses among male drug users each year                     | 180             | 120             | 240             | literatures <sup>20</sup>     |

|    |                                               |                                                                       |                   |                   |                   |                               |
|----|-----------------------------------------------|-----------------------------------------------------------------------|-------------------|-------------------|-------------------|-------------------------------|
| 19 | Tf                                            | the number of sexual intercours among female drug users each year     | 120               | 36                | 288               | literatures <sup>21</sup>     |
| 20 | HIV prevalence among female drug users in MMT | HIV prevalence among female drug users in MMT <u>(%)</u>              | <del>0.08</del>   | <del>0.01.6</del> | <del>0.08.3</del> | literatures <sup>22, 23</sup> |
| 21 | HIV prevalence among MSM                      | HIV prevalence among MSM <u>(%)</u>                                   | <del>0.11.6</del> | <del>0.08</del>   | <del>0.16.6</del> | literature <sup>24</sup>      |
| 22 | HCV prevalence among female drug users in MMT | HCV prevalence among female drug users in MMT <u>(%)</u>              | <del>0.01.6</del> | <del>0.01.2</del> | <del>0.02.0</del> | literatures <sup>25</sup>     |
| 23 | HCV prevalence among MSM                      | HCV prevalence among MSM <u>(%)</u>                                   | <del>0.01.2</del> | <del>0.01.0</del> | <del>0.01.6</del> | literatures <sup>19</sup>     |
| 24 | Pc                                            | the proportion of unprotected sexual intercours <u>(%)</u>            | <del>0.75</del>   | <del>0.70</del>   | <del>0.80</del>   | Meta <sup>9</sup>             |
| 25 | Ec HIV                                        | the effectiveness of condom in protecting HIV transmission <u>(%)</u> | <del>0.80</del>   | <del>0.70</del>   | <del>0.95</del>   | literatures <sup>26-28</sup>  |
| 26 | Ec HCV                                        | the effectiveness of condom in protecting HCV transmission <u>(%)</u> | <del>0.80</del>   | <del>0.70</del>   | <del>0.95</del>   | literatures <sup>26-28</sup>  |
| 27 | M                                             | the proportion of male MMT participants <u>(%)</u>                    | <del>0.90</del>   | <del>0.76</del>   | <del>0.97</del>   | CS                            |
| 28 | F                                             | The proportion of female MMT participants <u>(%)</u>                  | <del>0.10</del>   | <del>0.03</del>   | <del>0.24</del>   | CS                            |
| 29 | Pneedle HIV                                   | the infectivity of HIV when sharing injecting drugs                   | 0.01              | 0.0063            | 0.024             | literatures <sup>29</sup>     |

|    |                             |                                                                                       |                 |                              |                              |                               |
|----|-----------------------------|---------------------------------------------------------------------------------------|-----------------|------------------------------|------------------------------|-------------------------------|
| 30 | Pneedle HCV                 | the infectivity of HCV when sharing injecting drugs                                   | 0.03            | 0.015                        | 0.04                         | literatures <sup>30</sup>     |
| 31 | Tinj                        | times of injection each year                                                          | 80              | 73                           | 105                          | literatures <sup>9</sup>      |
| 32 | Pshare                      | the proportion of sterilized needles/syringes <u>(%)</u>                              | <del>0.40</del> | <del>0.10</del>              | <del>0.50</del>              | literatures <sup>31, 32</sup> |
| 33 | Pclean HIV                  | the probability of successful sterilization for HIV <u>(%)</u>                        | <del>0.70</del> | <del>0.60</del>              | <del>0.75</del>              | literatures <sup>33</sup>     |
| 34 | Pclean HCV                  | the probability of successful sterilization for HCV <u>(%)</u>                        | <del>0.35</del> | <del>0.30</del>              | <del>0.40</del>              | literatures <sup>34, 35</sup> |
| 35 | Phiv IDU                    | the prevalence of HIV among injecting drug users <u>(%)</u>                           | <del>0.10</del> | <del>0.09</del>              | <del>0.14</del>              | literatures <sup>36</sup>     |
| 36 | Phcv IDU                    | the prevalence of HCV among injecting drug users <u>(%)</u>                           | <del>0.80</del> | <del>0.50</del>              | <del>0.90</del>              | literatures <sup>37</sup>     |
| 37 | proportion of clearance     | the clearance rate of HCV <u>(%)</u>                                                  | <del>0.13</del> | 0                            | <del>0.80</del>              | literatures <sup>38</sup>     |
| 38 | proportion of HCV treatment | the proportion of MMT participants on HCV treatment <u>(%)</u>                        | <del>0.40</del> | <del>0.20</del>              | <del>0.60</del>              | consult                       |
| 39 | HCV treatment drop-outs     | the proportion of drop-out among MMT participants who are on HCV treatment <u>(%)</u> | <del>0.24</del> | <del>0.10</del> <sub>3</sub> | <del>0.29</del> <sub>2</sub> | literatures <sup>39, 40</sup> |
| 40 | proportion of cure for HCV  | the proportion of recovery after HCV treatment <u>(%)</u>                             | <del>0.62</del> | <del>0.25</del>              | <del>0.87</del>              | literatures <sup>40, 41</sup> |

|    |                                            |                                                                                                     |                              |                              |                              |                                   |
|----|--------------------------------------------|-----------------------------------------------------------------------------------------------------|------------------------------|------------------------------|------------------------------|-----------------------------------|
| 41 | proportion of HCV testing                  | proportion of HCV testing among MMT participants <u>(%)</u>                                         | <del>0.80</del>              | <del>0.78</del>              | <del>0.82</del>              | cohort, literatures <sup>42</sup> |
| 42 | proportion of HCV testing                  | proportion of HIV testing among MMT participants <u>(%)</u>                                         | <del>0.80</del>              | <del>0.78</del>              | <del>0.82</del>              | cohort, literatures <sup>42</sup> |
| 43 | proportion of new HIV positive             | proportion of new HIV infected MMT new entrants <u>(%)</u>                                          | <del>0.10</del> <sub>8</sub> | 0.00                         | <del>0.24</del> <sub>7</sub> | literatures <sup>23</sup>         |
| 44 | ART drop out rate                          | proportion of drop out among MMT participants on ART <u>(%)</u>                                     | <del>0.25</del>              | <del>0.17</del>              | <del>0.29</del>              | literatures <sup>43</sup>         |
| 45 | proportion of participants referred to ART | proportion of MMT participants who referred to ART among those who are diagnosed of AIDS <u>(%)</u> | <del>0.4</del> <sub>0</sub>  | <del>0.01</del> <sub>0</sub> | <del>0.65</del> <sub>0</sub> | literatures <sup>44</sup>         |
| 46 | proportion of progression to AIDS          | proportion of HIV progress to AIDS <u>(%)</u>                                                       | <del>0.25</del>              | <del>0.22</del> <sub>6</sub> | <del>0.26</del> <sub>4</sub> | literatures <sup>45</sup>         |

CS: cross-sectional survey, this study conducted a cross-sectional survey in 2011. We conducted a stratified random sampling method to select 12 clinics, located in nine cities (Guangzhou, Foshan, Jiangmen, Qingyuan, Zhaoqing, Dongguan, Shenzhen, Zhuhai, Yangjiang) in Guangdong province. A total of 802 participants were included in this study. The study design has been published elsewhere<sup>46</sup>.

Cohort: We established a seven-year cohort study including 14 MMT clinics in Guangdong province. The cohort study recruited 9412 MMT clients between July 2006 and March 2014. The study design has been published elsewhere<sup>47</sup>.

域代码已更改

域代码已更改

Table S2 system dynamic equations of the MMT system dynamic model

| sub-sytem        | type of equation | variables                                                       | descriptions of variables                                       | system dynamics equation                                      |
|------------------|------------------|-----------------------------------------------------------------|-----------------------------------------------------------------|---------------------------------------------------------------|
| MMT Clinic       | constant         | constant of close                                               | proportion of clinic closed in 2006-2013 <u>(%)</u>             | 0                                                             |
|                  | auxiliary        | <Time>                                                          | time                                                            | 2006-2013                                                     |
|                  | constant         | MMT CLINIC (initial)                                            | initial number of MMT clinics in 2006                           | 0                                                             |
|                  | flow             | establish rate                                                  | annual number of new MMT clinics                                | IF THEN ELSE(Time<=2007, 10 , IF THEN ELSE(Time<=2008, 3,0) ) |
|                  | flow             | close rate                                                      | annual number of MMT clinics closed                             | MMT CLINIC*constant of close                                  |
|                  | stock            | MMT CLINIC                                                      | number of MMT clinics                                           | (+establish rate-close rate, 0)                               |
| MMT participants | constant         | number of new drug users who have the intention to treat in MMT | number of new drug users who have the intention to treat in MMT | 600                                                           |
|                  | constant         | daily cost of MMT                                               | daily cost of MMT <u>(RMB)</u>                                  | 20                                                            |
|                  | auxiliary        | time to MMT                                                     | routine time to MMT clinics                                     | 5×distance to MMT-10                                          |

带格式的: 英语(美国)

|           |                                                              |                                                                     |                                                                                    |
|-----------|--------------------------------------------------------------|---------------------------------------------------------------------|------------------------------------------------------------------------------------|
| constant  | distance to MMT                                              | distance to MMT clinics<br>(kilometers)                             | 5                                                                                  |
| constant  | misconception to MMT                                         | proportion of misconception towards MMT (%)                         | <del>0.98</del>                                                                    |
| constant  | daily dosage of methadone                                    | average daily dosage of methadone<br>(ml)                           | 50                                                                                 |
| constant  | proportion of injecting among MMT participants who use drugs | proportion of injecting among MMT participants who use drugs (%)    | <del>0.60</del>                                                                    |
| constant  | proportion of drug use among MMT participants                | proportion of drug use among MMT participants (%)                   | <del>0.20</del>                                                                    |
| constant  | Sharing among injecting drug users                           | Proportion of needle/syringe sharing among injecting drug users (%) | <del>0.30</del>                                                                    |
| auxiliary | new participants                                             | annual new motivated MMT participants                               | 0.2× number of drug users with intention/motivation to participate MMT ×motivation |
| auxiliary | satisfaction                                                 | satisfaction factor                                                 | 90+MMT RETENTION/1300*(-10)                                                        |

带格式的: 英语(美国)

带格式的: 英语(美国)

|  |           |            |                                                                      |                                                                                                                                                                                                                                                                                                                                                                                                                                                                                                                                                                                                                                                                                                                                                                                                                                                                                                                         |
|--|-----------|------------|----------------------------------------------------------------------|-------------------------------------------------------------------------------------------------------------------------------------------------------------------------------------------------------------------------------------------------------------------------------------------------------------------------------------------------------------------------------------------------------------------------------------------------------------------------------------------------------------------------------------------------------------------------------------------------------------------------------------------------------------------------------------------------------------------------------------------------------------------------------------------------------------------------------------------------------------------------------------------------------------------------|
|  | auxiliary | motivation | Proportion of participants who have motivation to participate in MMT | $\text{MAX}(3.8385 - 0.044 * \text{daily cost of MMT} - 0.0129 * \text{MIN}(\text{time to MMT}, 240) - 0.0235 * 3 * \text{MIN}(\text{distance to MMT}, 60), 0)$                                                                                                                                                                                                                                                                                                                                                                                                                                                                                                                                                                                                                                                                                                                                                         |
|  | auxiliary | injection  | proportion of injecting drug users among MMT participants            | $\text{proportion of injecting among MMT participants who use drugs} * \text{proportion of drug use among MMT participants}$                                                                                                                                                                                                                                                                                                                                                                                                                                                                                                                                                                                                                                                                                                                                                                                            |
|  | auxiliary | Pshare     | proportion of needle/syringe sharing among MMT participants          | $\text{injection} * \text{proportion of needle sharing among injecting drug users}$                                                                                                                                                                                                                                                                                                                                                                                                                                                                                                                                                                                                                                                                                                                                                                                                                                     |
|  | auxiliary | arrest     | proportion of being arrested among MMT participants                  | $\text{MIN}(\text{proportion of drug use among MMT participants} * \text{arrest among drug users}, 1)$                                                                                                                                                                                                                                                                                                                                                                                                                                                                                                                                                                                                                                                                                                                                                                                                                  |
|  | auxiliary | drop out   | proportion of drop-out                                               | $\text{MIN}(\text{EXP}(-1.5562 + 0.0124 * \text{time to MMT} + 0.04 * \text{daily cost of MMT} - 0.00577 * \text{satisfaction} + 0.4024 * (8 * 1e-008 * \text{distance to MMT} * \text{distance to MMT} * \text{distance to MMT} - 2 * 1e-005 * \text{distance to MMT} * \text{distance to MMT} + 0.0027 * \text{distance to MMT} + 0.863) - 0.00208 * \text{daily dosage of methadone})) / (1 + \text{EXP}(-1.5562 + 0.0124 * \text{MIN}(\text{time to MMT}, 240) + 0.04 * \text{daily cost of MMT} - 0.00577 * \text{satisfaction} + 0.4024 * (8 * 1e-008 * \text{distance to MMT} * \text{distance to MMT} * \text{distance to MMT} - 2 * 1e-005 * \text{distance to MMT} * \text{distance to MMT} + 0.0027 * \text{distance to MMT} + 0.863) - 0.00208 * \text{daily dosage of methadone}))) + \text{proportion of drug use among MMT participants} * 0.2 + \text{arrest} + \text{misconception to MMT} * 0.18, 1)$ |

|                       |          |                                                                      |                                                                                 |                                                                                                                    |
|-----------------------|----------|----------------------------------------------------------------------|---------------------------------------------------------------------------------|--------------------------------------------------------------------------------------------------------------------|
|                       | flow     | new enrollment                                                       | annual new MMT participants                                                     | $(\text{DELAY1}(\text{establish rate} \times 100, 1) + \text{new participants}, 0)$                                |
|                       | flow     | re-enrollment                                                        | annual MMT participants who were re-enrolled                                    | $\text{motivation} \times (\text{drop out} \times 0.85 + \text{DELAY1}(\text{referral}, 0.5)) / 2.4125$            |
|                       | constant | proportion of successfully detoxification                            | proportion of successfully detoxification <u>(%)</u>                            | <del>0.00</del> <sub>1</sub>                                                                                       |
|                       | flow     | other detox                                                          | annual number of MMT participants successfully detoxed                          | $\text{MMT RETENTION} \times \text{proportion of successful detoxification}$                                       |
|                       | flow     | proportion of deaths                                                 | proportion of deaths among MMT participants                                     | $\text{DELAY1}(0.0286, 5)$                                                                                         |
|                       | flow     | die                                                                  | annual number of deaths among MMT participants                                  | $\text{MMT RETENTION} \times \text{proportion of deaths}$                                                          |
|                       | flow     | drop out                                                             | annual number of drop-outs among MMT participants                               | $\text{MMT RETENTION} \times \text{proportion of drop out}$                                                        |
|                       | stock    | MMT RETENTION                                                        | number of MMT participants                                                      | $(\text{INTEGER}(\text{new enrollment} + \text{"re-enrollment"} - \text{die} - \text{other detox-drop out}), 605)$ |
| Detoxification center | constant | Proportion of individuals referred from detoxification center to MMT | Proportion of individuals referred from detoxification center to MMT <u>(%)</u> | <del>0.20</del>                                                                                                    |

|                  |           |              |                                                                                                            |                                                                                   |
|------------------|-----------|--------------|------------------------------------------------------------------------------------------------------------|-----------------------------------------------------------------------------------|
|                  | auxiliary | referral     | annual number of drug users referred to MMT from detoxification center                                     | release rate*Proportion of individuals referred from detoxification center to MMT |
|                  | constant  | arrest       | proportion of MMT participants arrested by the police <u>(%)</u>                                           | <del>0.20</del>                                                                   |
|                  | flow      | annual       | number of MMT participants being arrested into detoxification center                                       | proportion of drug use among MMT participants*MMT RETENTION*arrest                |
|                  | flow      | release rate | number of people released from the prison                                                                  | DELAY1(DC CENTER*0.9,2)                                                           |
|                  | stock     | DC CENTER    | number of people in detoxification center                                                                  | (INTEGER(arrest rate-release rate), 0)                                            |
| HIV transmission | constant  | p HIV(m→f)   | the probability of HIV transmission from HIV positive male to HIV negative female through sexual behaviors | 0.00124                                                                           |
|                  | constant  | Pc           | proportion of unprotected sexual behaviors <u>(%)</u>                                                      | <del>0.75</del>                                                                   |
|                  | constant  | Ec HIV       | effectiveness of condom in protecting from HIV transmission                                                | 0.8                                                                               |
|                  | constant  | M            | proportion of male participants in MMT <u>(%)</u>                                                          | <del>0.90</del>                                                                   |

|  |           |                                               |                                                                                                            |                                                                                                                                                             |
|--|-----------|-----------------------------------------------|------------------------------------------------------------------------------------------------------------|-------------------------------------------------------------------------------------------------------------------------------------------------------------|
|  | constant  | HIV prevalence among female drug users in MMT | HIV prevalence among female drug users in MMT <u>(%)</u>                                                   | <del>0.08</del>                                                                                                                                             |
|  | constant  | p HIV(f→m)                                    | the probability of HIV transmission from HIV positive female to HIV negative male through sexual behaviors | 0.00377                                                                                                                                                     |
|  | constant  | F                                             | proportion of female participants in MMT <u>(%)</u>                                                        | <del>0.10</del>                                                                                                                                             |
|  | constant  | Pneedle HIV                                   | the probability of HIV transmission per injecting act                                                      | 0.01                                                                                                                                                        |
|  | constant  | Pn                                            | the proportion of needle sterilization used by MMT participants when injecting <u>(%)</u>                  | <del>0.40</del>                                                                                                                                             |
|  | constant  | Pclean HIV                                    | the proportion of being successful sterilized for HIV <u>(%)</u>                                           | <del>0.70</del>                                                                                                                                             |
|  | auxiliary | Tm                                            | average number of sexual acts per year for male participants                                               | WITH LOOKUP (Time, ([ (2004,0)-(2013,200)],(2004,180),(2005,180),(2006,180),(2007,180),(2008,180),(2009,180),(2010,180),(2011,180),(2012,180),(2013,180)))) |
|  | constant  | p HIV(m→m)                                    | the probability of HIV transmission from HIV positive male to HIV                                          | 0.014                                                                                                                                                       |

|  |           |                                          |                                                                       |                                                                                                                                                                               |
|--|-----------|------------------------------------------|-----------------------------------------------------------------------|-------------------------------------------------------------------------------------------------------------------------------------------------------------------------------|
|  |           |                                          | negative male through sexual behaviors                                |                                                                                                                                                                               |
|  | constant  | HIV prevalence among MSM                 | HIV prevalence among MSM (%)                                          | <del>0.11</del> .6                                                                                                                                                            |
|  | auxiliary | <HIV prevalence among male participants> | HIV prevalence among male participants                                | MIN(HIV cases/(MMT RETENTION*proportion of HIV testing+0.0001),1)                                                                                                             |
|  | auxiliary | Tf                                       | average number of sexual acts per year for female participants        | WITH LOOKUP(Time,([(2004,0)-(2013,200)], (2004,156),(2005,152),(2006,147),(2007,143), (2008,138),(2009,134),(2010,129),(2011,125),(2012,120), (2013,117)))                    |
|  | auxiliary | Pf-m HIV                                 | The probability of HIV transmission through sexual behaviors          | (1-POWER((1-"p HIV(f→m)"),Tf*Pc)*POWER((1-(1-Ec HIV)*"p HIV(f→m)"),(Tf*(1-Pc))))*HIV prevalence among female drug users in MMT                                                |
|  | auxiliary | Pshare                                   | <proportion of needle/syringe sharing among MMT participants>         | injection*proportion of needle sharing among injecting drug users                                                                                                             |
|  | auxiliary | Tinj                                     | average times of injecting behaviors per year                         | WITH LOOKUP(Time,([(2004,0)-(2013,200)],(2004,104.98),(2005,86.51),(2006,101.79),(2007,95.01),(2008,89.96),(2009,83.43),(2010,80.49),(2011,78.05),(2012,76.68),(2013,73.99))) |
|  | auxiliary | Ps HIV                                   | the proportion of HIV transmission through injecting using sterilized | 1-POWER((1-Pneedle HIV*(1-Pclean HIV)),Pn*Tinj*Pshare)                                                                                                                        |

|                  |           |                                               |                                                                                                               |                                                                                             |
|------------------|-----------|-----------------------------------------------|---------------------------------------------------------------------------------------------------------------|---------------------------------------------------------------------------------------------|
|                  |           |                                               | needle/syringe among MMT participants                                                                         |                                                                                             |
|                  | auxiliary | Pu HIV                                        | the proportion of HIV transmission through injecting using unsterilized needle/syringe among MMT participants | $1 - \text{POWER}((1 - P_{\text{needle HIV}}), \text{Tinj} * P_{\text{share}} * (1 - P_n))$ |
|                  | auxiliary | Pinj HIV                                      | probability of HIV transmission through injecting behaviors                                                   | $(1 - (1 - P_s \text{ HIV}) * (1 - P_u \text{ HIV})) * P_{\text{hiv IDU}}$                  |
|                  | auxiliary | Phiv IDU                                      | HIV prevalence among injecting drug users (%)                                                                 | <del>0.10</del>                                                                             |
|                  | auxiliary | HIV incidence                                 | HIV incidence among MMT participants                                                                          | $1 - (1 - P_{\text{inj HIV}}) * (1 - P_{\text{sex HIV}})$                                   |
| HCV transmission | constant  | p HCV(m→f)                                    | the probability of HCV transmission from HCV positive male to HCV negative female through sexual behaviors    | 0.00125                                                                                     |
|                  | auxiliary | HCV prevalence among MMT participants         | HCV prevalence among MMT participants                                                                         | HCV cases/(MMT RETENTION*proportion of HCV testing)                                         |
|                  | constant  | HCV prevalence among female drug users in MMT | HCV prevalence among female drug users in MMT (%)                                                             | <del>0.01</del> 6                                                                           |

|  |           |            |                                                                                                            |                                                                                                                                                            |
|--|-----------|------------|------------------------------------------------------------------------------------------------------------|------------------------------------------------------------------------------------------------------------------------------------------------------------|
|  | auxiliary | Tm         | < average number of sexual acts per year for male participants >                                           | WITH LOOKUP(Time, ([ (2004,0)-(2013,200)],(2004,180),(2005,180),(2006,180),(2007,180),(2008,180),(2009,180),(2010,180),(2011,180),(2012,180),(2013,180) )) |
|  | constant  | Pc         | < proportion of unprotected sexual behaviors > <u>(%)</u>                                                  | <del>0.75</del>                                                                                                                                            |
|  | auxiliary | Tf         | < average number of sexual acts per year for female participants >                                         | WITH LOOKUP(Time,([ (2004,0)-(2013,200)],(2004,156),(2005,152),(2006,147),(2007,143),(2008,138),(2009,134),(2010,129),(2011,125),(2012,120),(2013,117) ))  |
|  | constant  | M          | < proportion of male participants in MMT > <u>(%)</u>                                                      | <del>0.90</del>                                                                                                                                            |
|  | constant  | F          | < proportion of female participants in MMT > <u>(%)</u>                                                    | <del>0.10</del>                                                                                                                                            |
|  | constant  | p HCV(f→m) | the probability of HCV transmission from HCV positive female to HCV negative male through sexual behaviors | 0.00125                                                                                                                                                    |
|  | constant  | Ec HCV     | effectiveness of condom in protecting from HCV transmission                                                | 0.8                                                                                                                                                        |

|           |                                   |                                                                                                             |                                                                                                                                                                                                                                 |
|-----------|-----------------------------------|-------------------------------------------------------------------------------------------------------------|---------------------------------------------------------------------------------------------------------------------------------------------------------------------------------------------------------------------------------|
| auxiliary | Pf-m HCV                          | the probability of HCV transmission through sexual behaviors                                                | $(1 - \text{POWER}((1 - p_{\text{HCV}(f \rightarrow m)}), T_f * P_c)) * \text{POWER}((1 - (1 - E_c \text{ HCV}) * p_{\text{HCV}(f \rightarrow m)}), (T_f * (1 - P_c)))) * \text{HCV prevalence among female drug users in MMT}$ |
| constant  | $p_{\text{HCV}(m \rightarrow m)}$ | the probability of HCV transmission from HCV positive male to HCV negative male through sexual behaviors    | 0.0014                                                                                                                                                                                                                          |
| constant  | HCV prevalence among MSM          | HCV prevalence among MSM <u>(%)</u>                                                                         | <del>0.01</del> 2                                                                                                                                                                                                               |
| auxiliary | Pshare                            | proportion of needle/syringe sharing among MMT participants                                                 | proportion of injecting among drug users $\times$ proportion of needle/syringe sharing among injecting drug users                                                                                                               |
| constant  | Pneedle HCV                       | The probability of HCV transmission per injecting act                                                       | 0.03                                                                                                                                                                                                                            |
| constant  | Phcv IDU                          | HCV prevalence among injecting drug users <u>(%)</u>                                                        | <del>0.80</del>                                                                                                                                                                                                                 |
| auxiliary | Ps HCV                            | the proportion of HCV transmission through injecting using sterilized needle/syringe among MMT participants | $1 - \text{POWER}((1 - P_{\text{needle HCV}} * (1 - P_{\text{clean HCV}})), P_n * T_{\text{inj}} * P_{\text{share}})$                                                                                                           |
| auxiliary | Pu HCV                            | the proportion of HCV transmission through injecting                                                        | $1 - \text{POWER}((1 - P_{\text{needle HCV}}), T_{\text{inj}} * P_{\text{share}} * (1 - P_n))$                                                                                                                                  |

|                                  |           |                                                      |                                                                                               |                                                                                                                           |
|----------------------------------|-----------|------------------------------------------------------|-----------------------------------------------------------------------------------------------|---------------------------------------------------------------------------------------------------------------------------|
|                                  |           |                                                      | using unsterilized needle/syringe among MMT participants                                      |                                                                                                                           |
|                                  | auxiliary | Pinj HCV                                             | the probability of HCV transmission through injecting behaviors                               | $(1-(1-P_s \text{ HCV})*(1-P_u \text{ HCV}))*Phcv \text{ IDU}$                                                            |
|                                  | auxiliary | HCV incidence                                        | HCV incidence among MMT participants                                                          | $DELAY1(1-(1-P_{inj} \text{ HCV})*(1-P_{sex} \text{ HCV}), 1)$                                                            |
|                                  | constant  | Pn                                                   | < the proportion of needle sterilization used by MMT participants when injecting > <u>(%)</u> | <del>0.40</del>                                                                                                           |
|                                  | constant  | Pclean HCV                                           | the proportion of being successful sterilized for HCV <u>(%)</u>                              | <del>0.35</del>                                                                                                           |
| HIV testing and treatment system | auxiliary | HIV incidence                                        | <HIV incidence among MMT participants>                                                        | $1-(1-P_{inj} \text{ HIV})*(1-P_{sex} \text{ HIV})$                                                                       |
|                                  | flow      | new infection rate                                   | annual number of new infections among MMT participants                                        | $MMT \text{ RETENTION} * HIV \text{ incidence}$                                                                           |
|                                  | stock     | UNDIAGNOSED HIV                                      | number of MMT participants who were undiagnosed of HIV                                        | $(INTEGER(new \text{ infection rate} + new \text{ HIV positive rate} - HIV \text{ testing rate} - "drop-out rate 1"), 0)$ |
|                                  | auxiliary | total proportion of drop-outs among MMT participants | total proportion of drop out                                                                  | proportion of deaths+proportion of successful detoxification+proportion of drop out                                       |

|  |           |                                   |                                                                                         |                                                                                       |
|--|-----------|-----------------------------------|-----------------------------------------------------------------------------------------|---------------------------------------------------------------------------------------|
|  | flow      | drop out rate                     | annual number of MMT participants who dropped out of MMT                                | total proportion of drop out*UNDIAGNOSED HIV                                          |
|  | auxiliary | Proportion of HIV testing         | the proportion of HIV testing among participants in MMT clinics. <del>0.80</del><br>(%) |                                                                                       |
|  | flow      | HIV testing rate                  | annual number of HIV new testing participants in MMT clinics                            | UNDIAGNOSED HIV*proportion of HIV testing                                             |
|  | stock     | DIAGNOSED HIV                     | number of diagnosed HIV participants in MMT clinics                                     | (INTEGER(ART drop out rate+HIV testing rate-HIV progress rate-"drop-out rate 2"),155) |
|  | auxiliary | proportion of new HIV positive    | the proportion of new HIV positive participants in MMT clinics. <del>0.10</del><br>(%)  | 8                                                                                     |
|  | flow      | new HIV positive rate             | annual number of new HIV positive participants in MMT clinics                           | proportion of new HIV positive*enrollment                                             |
|  | constant  | proportion of progression to AIDS | the proportion of HIV progression to AIDS stage. <del>0.25</del><br>(%)                 |                                                                                       |
|  | flow      | HIV progress rate                 | annual number of new HIV infected participants progress to AIDS in MMT clinics          | proportion of progression to AIDS*DIAGNOSED HIV                                       |

|  |           |                                   |                                                                    |                                                                                                                                                                                                                                                        |
|--|-----------|-----------------------------------|--------------------------------------------------------------------|--------------------------------------------------------------------------------------------------------------------------------------------------------------------------------------------------------------------------------------------------------|
|  | stock     | AIDS                              | number of AIDS patients in MMT clinics                             | (HIV progress rate-"drop-out rate 3"-ART rate,0)                                                                                                                                                                                                       |
|  | auxiliary | proportion of progression to AIDS | the proportion of MMT participants in ART                          | WITH LOOKUP (Time, ([ (2004,0)-(2020,10)],(2004,0),(2005,0),(2006,0.01),(2007,0.129),(2008,0.227),(2009,0.298),(2010,0.371),(2011,0.521),(2012,0.6),(2013,0.65),(2014,0.65),(2015,0.65),(2016,0.65),(2017,0.65),(2018,0.65),(2019,0.65),(2020,0.65) )) |
|  | flow      | ART rate                          | annual number of MMT participants in ART                           | AIDS*proportion of participants referred to ART                                                                                                                                                                                                        |
|  | auxiliary | HIV cases                         | accumulated number of HIV infections in MMT clinics                | (ART+DIAGNOSED HIV+AIDS,0)                                                                                                                                                                                                                             |
|  | stock     | ART                               | number of MMT participants in ART                                  | (INTEGER(ART rate-ART drop out rate-HIV deaths rate 4-drop out rate 4),0)                                                                                                                                                                              |
|  | constant  | proportion of drop-outs in ART    | the proportion of MMT participants dropping out of ART_ <u>(%)</u> | <del>0.25</del>                                                                                                                                                                                                                                        |
|  | flow      | ART drop out rate                 | annual number of MMT participants dropping out of ART              | ART*"proportion of drop-outs in ART"                                                                                                                                                                                                                   |
|  | constant  | proportion of deaths for HIV      | proportion of MMT participants died of AIDS after initiating ART   | DELAY1(0.73,10)                                                                                                                                                                                                                                        |

|                           |           |                                       |                                                                      |                                                                                                                                                                    |
|---------------------------|-----------|---------------------------------------|----------------------------------------------------------------------|--------------------------------------------------------------------------------------------------------------------------------------------------------------------|
|                           | auxiliary | HIV prevalence among MMT participants | HIV prevalence among MMT participants                                | HIV cases/(MMT RETENTION*proportion of HIV testing)                                                                                                                |
| HCV testing and treatment | auxiliary | HCV incidence                         | <HCV incidence among MMT participants>                               | DELAY1(1-(1-Pinj HCV)*(1-Psex HCV), 1)                                                                                                                             |
|                           | flow      | new HCV infection rate                | annual new HCV infections among MMT participants                     | HCV incidence*MMT RETENTION                                                                                                                                        |
|                           | stock     | UNDIAGNOSED HCV                       | number of undiagnosed HCV participants in MMT                        | (new HCV positive rate+new HCV infection rate+new HCV positive rate-"drop-outs rate 5"-HCV clearance among undiagnosed HCV positive clients-HCV testing rate,1050) |
|                           | auxiliary | proportion of HCV testing             | the proportion of HCV testing among participants in MMT clinics. (%) | <del>0.80</del>                                                                                                                                                    |
|                           | flow      | HCV testing rate                      | annual number of HCV new testing participants in MMT clinics         | UNDIAGNOSED HCV*proportion of HCV testing                                                                                                                          |
|                           | auxiliary | proportion of new HCV positive        | The proportion of new HCV positive participants in MMT clinics. (%)  | <del>0.80</del>                                                                                                                                                    |
|                           | flow      | new HCV positive rate                 | annual number of new HCV positive participants in MMT clinics        | proportion of new HCV positive*enrollment                                                                                                                          |

|  |           |                                          |                                                                             |                                                                                                                                                                                                                   |
|--|-----------|------------------------------------------|-----------------------------------------------------------------------------|-------------------------------------------------------------------------------------------------------------------------------------------------------------------------------------------------------------------|
|  | stock     | DIAGNOSED HCV                            | number of HCV diagnosed HCV participants in MMT clinics                     | (+HCV testing rate+HCV treatment drop out rate-"drop-outs rate 6"-HCV clearance among diagnosed HCV-HCV treatment rate,299)                                                                                       |
|  | auxiliary | proportion of HCV treatment              | the proportion of MMT participants receiving HCV treatment                  | WITH LOOKUP (Time, ([ (2006,0)-(2020,10)],(2006,0.2),(2007,0.2),(2008,0.2),(2009,0.2),(2010,0.2),(2011,0.5),(2012,0.6),(2013,0.6),(2014,0.6),(2015,0.6),(2016,0.6),(2017,0.6),(2018,0.6),(2019,0.6),(2020,0.6) )) |
|  | flow      | HCV treatment rate                       | annual number of MMT participants receiving HCV treatment                   | proportion of HCV treatment*DIAGNOSED HCV                                                                                                                                                                         |
|  | stock     | HCV TREATMENT                            | number of MMT participants have ever received HCV treatment                 | (HCV treatment rate-"drop-outs rate 7"-cure rate for HCV treatment-HCV treatment drop out rate,0)                                                                                                                 |
|  | constant  | HCV treatment drop-outs                  | the proportion of MMT participants dropping out of HCV treatment <u>(%)</u> | <del>0.24</del>                                                                                                                                                                                                   |
|  | flow      | HCV treatment drop out rate              | annual number of MMT participants dropping out of HCV treatment             | HCV TREATMENT*"HCV treatment drop-outs"                                                                                                                                                                           |
|  | constant  | Proportion of participants cured for HCV | the proportion of MMT participants cured of HCV after treatment <u>(%)</u>  | <del>0.62</del>                                                                                                                                                                                                   |

|  |           |                                       |                                                                                  |                                                                                                                                               |
|--|-----------|---------------------------------------|----------------------------------------------------------------------------------|-----------------------------------------------------------------------------------------------------------------------------------------------|
|  | flow      | cure rate for HCV treatment           | annual number of MMT participants cured of HCV after treatment                   | the proportion of MMT participants cured of HCV after treatment $\times$ number of MMT participants have ever received HCV treatment          |
|  | stock     | CURE FOR HCV                          | number of MMT participants who were ever cured of HCV                            | (+cure rate for HCV treatment+cure rate due to HCV clearance-"drop-outs rate 9",0)                                                            |
|  | auxiliary | HCV cases                             | accumulated number of HCV infections in MMT clinics                              | HCV TREATMENT+DIAGNOSED HCV                                                                                                                   |
|  | auxiliary | HCV prevalence among MMT participants | HCV prevalence among MMT participants                                            | HCV cases/(MMT RETENTION*proportion of HCV testing)                                                                                           |
|  | constant  | Proportion of clearance 3             | Proportion of participants cured due to self-clearance of HCV (%)                | 100                                                                                                                                           |
|  | flow      | cure rate due to HCV clearance        | annual number of MMT participants who were cured due to self-clearance of HCV    | HCV CLEARANCE*proportion of clearance3                                                                                                        |
|  | stock     | HCV CLEARANCE                         | number of MMT participants who ever being self-clearance of HCV                  | (+HCV clearance among undiagnosed HCV positive clients+HCV clearance among diagnosed HCV-"drop-outs rate 8"-cure rate due to HCV clearance,0) |
|  | constant  | proportion of clearance 1             | the proportion of self-clearance among diagnosed HCV patients in MMT clinics (%) | 0.13                                                                                                                                          |

|  |          |                                                      |                                                                                               |                                                                                                                                 |
|--|----------|------------------------------------------------------|-----------------------------------------------------------------------------------------------|---------------------------------------------------------------------------------------------------------------------------------|
|  | flow     | HCV clearance among diagnosed HCV                    | annual number of HCV self-clearance among diagnosed HCV patients in MMT clinics               | proportion of clearance 1*DIAGNOSED HCV                                                                                         |
|  | constant | proportion of clearance 2                            | the proportion of self-clearance among HCV infected without testing in MMT clinics <u>(%)</u> | <del>0.13</del>                                                                                                                 |
|  | flow     | HCV clearance among undiagnosed HCV positive clients | annual number of HCV self-clearance among HCV infected without HCV testing in MMT clinics     | the proportion of self-clearance among HCV infected without testing in MMT clinics × number of HCV infected without HIV testing |

**Table S3 Effectiveness of health education, psychological counseling, contingency management, needle exchange program, condom promotion, ART and HCV treatment**

| Interventions               | Misconcep<br>tion (%) | drug use (%) | injecting drug<br>use (%) | needle<br>sharing (%) | unprotected<br>sex (%) | ART<br>(%) | HCV<br>treatment_<br>(%) | Source                        |
|-----------------------------|-----------------------|--------------|---------------------------|-----------------------|------------------------|------------|--------------------------|-------------------------------|
| Origin                      | 0.98                  | 0.20         | 0.60                      | 0.30                  | 0.75                   | 0.60       | 0.40                     |                               |
| Health Education            | 0.78                  | --           | --                        | 0.25                  | --                     | --         | --                       | Meta-analysis <sup>48</sup>   |
| Psychological<br>Counseling | --                    | 0.11         | 0.25                      | 0.19                  | --                     | --         | --                       | Literatures <sup>49, 50</sup> |
| Contingency<br>Management   | --                    | 0.17         | 0.24                      | 0.21                  | --                     | --         | --                       | Literatures <sup>50, 51</sup> |
| Needle Exchange<br>Program  | 0.57                  | --           | --                        | 0.23                  | 0.63                   | --         | --                       | Meta-analysis <sup>52</sup>   |
| Condom Promotion            | --                    | --           | --                        | --                    | 0.30                   | --         | --                       | Literatures <sup>53</sup>     |
| ART                         | --                    | --           | --                        | --                    | --                     | 0.75       | --                       | Literatures <sup>44</sup>     |
| HCV Treatment               | --                    | --           | --                        | --                    | --                     | --         | 0.78                     | Literatures <sup>54</sup>     |

带格式表格

## Reference

1. Zhang L, Zou X, Zhang D, Li X, Zhao P, Ling L. Investigation of Repeat Client Drop-Out and Re-Enrolment Cycles in Fourteen Methadone Maintenance Treatment Clinics in Guangdong, China. *PloS one* 2015;10:e0139942.
2. Li X. Study on the relationship between the patients' accessibility and treatment outcome in methadone maintenance treatment in Guangdong Province. School of Public Health, Guangzhou: Sun Yat-sen University; 2015, p. 86.
3. Gu J, Xu H, Lau JT, Hao Y, Zhong Y, Fan L, Zhao Y, Hao C, Ling W. Misconceptions predict dropout and poor adherence prospectively among newly admitted first-time methadone maintenance treatment clients in Guangzhou, China. *Addiction (Abingdon, England)* 2012;107:1641-9.
4. Chen W, Xia Y, Hong Y, Hall BJ, Ling L. Predictors of continued HIV-risk behaviors among drug users in methadone maintenance therapy program in China--a prospective study. *Harm reduction journal* 2013;10:23.
5. Meng J, Burris S. The role of the Chinese police in methadone maintenance therapy: a literature review. *The International journal on drug policy* 2013;24:e25-34.
6. Ma Y, Du C, Cai T, Han Q, Yuan H, Luo T, Ren G, Mburu G, Wang B, Golichenko O, Zhang C. Barriers to community-based drug dependence treatment: implications for police roles, collaborations and performance indicators. *Journal of the International AIDS Society* 2016;19:20879.
7. Chen J, Chen W, Ling L, Xia Y, He Q, Chen A, Han L. Dosage Using in Community Methadone Maintenance Treatment at Clinics in Guangdong and Its Evaluation. *Modern Preventive Medicine* 2010;37:1687-9.
8. Yan X, Yang Y, Gong J, Min J, Li G. The Methadone Dosage on Methadone Maintain Treatment in Jiangxi Province and Its Influencing Factors. *Forum on Low-Carbon Life and Harm on Health, Inner Mongolia: China Environment Mutagen Society of Risk Assessment Committee*; 2011, pp. 105-15.
9. Zhang L, Chow EP, Zhuang X, Liang Y, Wang Y, Tang C, Ling L, Tucker JD, Wilson DP. Methadone maintenance treatment participant retention and behavioural effectiveness in China: a systematic review and meta-analysis. *PloS one* 2013;8:e68906.
10. Luo X, Zhao P, Gong X, Zhang L, Tang W, Zou X, Chen W, Ling L. Concurrent Heroin Use and Correlates among Methadone Maintenance Treatment Clients: A 12-Month Follow-up Study in Guangdong Province, China. *International journal of environmental research and public health* 2016;13.

11. Marienfeld C, Liu P, Wang X, Schottenfeld R, Zhou W, Chawarski MC. Evaluation of an implementation of methadone maintenance treatment in China. *Drug and alcohol dependence* 2015;157:60-7.
12. Newspaper BT. Why the proportion of detoxification is lower than 2%? Beijing: Beijing Techonology Newspaper; 2005.
13. Zhou T, Fu Z, Wu Y, Zhu X, Wang J. Establishment and Practice of the Referral Mechanism from Compulsory Detoxification Agencies to Methadone Maintenance Treatment Clinic. *Chinese Journal of ADIS and STDs* 2011;17:73-5.
14. Wang G, Lin F, Chang D, Song L, Wang W. Referral Mechanism Between Compulsory Detoxification Center to Methadone Maintenance Treatment Clinics in Some City. *Modern Preventive Medicine* 2010;37:2344-7.
15. Boily MC, Baggaley RF, Wang L, Masse B, White RG, Hayes RJ, Alary M. Heterosexual risk of HIV-1 infection per sexual act: systematic review and meta-analysis of observational studies. *The Lancet Infectious diseases* 2009;9:118-29.
16. Baggaley RF, White RG, Boily MC. HIV transmission risk through anal intercourse: systematic review, meta-analysis and implications for HIV prevention. *International journal of epidemiology* 2010;39:1048-63.
17. Everhart JE, Di Bisceglie AM, Murray LM, Alter HJ, Melpolder JJ, Kuo G, Hoofnagle JH. Risk for non-A, non-B (type C) hepatitis through sexual or household contact with chronic carriers. *Annals of internal medicine* 1990;112:544-5.
18. Sexual Transmission of HCV. <http://www.hepcassoc.org/news/article27.html>. In: Association HC, editor.; 2002.
19. Chow EPF, Tucker JD, Wong FY, Nehl EJ, Wang Y, Zhuang X, Zhang L. Disparities and risks of sexually transmissible infections among men who have sex with men in China: a meta-analysis and data synthesis. *PloS one* 2014;9:e89959. doi: 10.1371/journal.pone.0089959.
20. Liao Y, Jiang J, Wei S, Li M, Shi S, He B, Xiang S, Deng W, Ning C, Xu N, Wei F, Liang B, Wei B, Liang H. Changes in Sexual Behaviors After Drug Use and Their Influencing Factors Among Male Drug Users in Guangxi, China. *Chinese Journal of Disease Control and Prevention* 2012;16:1032-5.
21. He Y, Ruan Y, Teng T, Hao Q, Qin G, Wu J, Zhu G, Chen K, Liu S, Zhou F, Shao Y. Drug use Behaviors and Sexual Characteristics among Community-based Female Intravenous Drug users. *Chinese Journal of ADIS and STDs* 2003;9:343-6.
22. Health CMo, UNAIDS, WHO. 2011 Estimates for the HIV/AIDS Epidemics in China. Beijing; 2011.

域代码已更改

23. Zhuang X, Liang Y, Chow EP, Wang Y, Wilson DP, Zhang L. HIV and HCV prevalence among entrants to methadone maintenance treatment clinics in China: a systematic review and meta-analysis. *BMC infectious diseases* 2012;12:130.
24. Li YZ, Xu JJ, Qian HZ, You BX, Zhang J, Zhang JM, Hu QH, Chu ZX, Liu SY, Jiang YJ, Geng WQ, Shang H. High prevalence of HIV infection and unprotected anal intercourse among older men who have sex with men in China: a systematic review and meta-analysis. *BMC infectious diseases* 2014;14:531.
25. Qian HZ, Yang Z, Shi X, Gao J, Xu C, Wang L, Zhou K, Cui Y, Zheng X, Wu Z, Lu F, Lai S, Vermund SH, Shao Y, Wang N. Hepatitis C virus infection in former commercial plasma/blood donors in rural Shanxi Province, China: the China Integrated Programs for Research on AIDS. *The Journal of infectious diseases* 2005;192:1694-700.
26. Pinkerton SD, Abramson PR. Effectiveness of condoms in preventing HIV transmission. *Social science & medicine* (1982) 1997;44:1303-12.
27. Smith DK, Herbst JH, Zhang X, Rose CE. Condom effectiveness for HIV prevention by consistency of use among men who have sex with men in the United States. *Journal of acquired immune deficiency syndromes* (1999) 2015;68:337-44.
28. Liu H, Su Y, Zhu L, Xing J, Wu J, Wang N. Effectiveness of ART and condom use for prevention of sexual HIV transmission in serodiscordant couples: a systematic review and meta-analysis. *PloS one* 2014;9:e111175.
29. Baggeley RF, Boily MC, White RG, Alary M. Risk of HIV-1 transmission for parenteral exposure and blood transfusion: a systematic review and meta-analysis. *AIDS (London, England)* 2006;20:805-12.
30. Gerberding JL. Management of occupational exposures to blood-borne viruses. *The New England journal of medicine* 1995;332:444-51.
31. UNAIDS. 2008 Report on the Global AIDS Epidemic. New York; 2008.
32. Cheng F, Chen H, Li J, Zhang L, Hu H, Zhang J, Cheng H, Stewart W, Shen J. Sash Survey on High Risk Behaviors of IDUs in Four Cities of Yunnan and Sichuan. *Chinese Journal of Drug Dependence* 2003;12:294-8.
33. Abdala N, Gleghorn AA, Carney JM, Heimer R. Can HIV-1-contaminated syringes be disinfected? Implications for transmission among injection drug users. *Journal of acquired immune deficiency syndromes* (1999) 2001;28:487-94.
34. Hagan H, Thiede H. Does bleach disinfection of syringes help prevent hepatitis C virus transmission? *Epidemiology (Cambridge, Mass)* 2003;14:628-9; author reply 9.

35. Agolini G, Russo A, Clementi M. Effect of phenolic and chlorine disinfectants on hepatitis C virus binding and infectivity. *American journal of infection control* 1999;27:236-9.
36. Li X. A Research of the Incidence of HIV/HCV/HBV/Syphilis and Risk Behaviors Among Injecting Drug Users in Xichang County of Sichuan Province. *Epidemiology and Medical Statistics*, Suzhou: Soochow University; 2011.
37. Xia X, Luo J, Bai J, Yu R. Epidemiology of hepatitis C virus infection among injection drug users in China: systematic review and meta-analysis. *Public health* 2008;122:990-1003.
38. Micallef JM, Kaldor JM, Dore GJ. Spontaneous viral clearance following acute hepatitis C infection: a systematic review of longitudinal studies. *Journal of viral hepatitis* 2006;13:34-41.
39. van Vlerken LG, Lieveld FI, van Meer S, Koek GH, van Nieuwkerk KM, Friederich P, Arends JE, Siersema PD, Burger DM, van Erpecum KJ. Adherence to ribavirin in chronic hepatitis C patients on antiviral treatment: Results from a randomized controlled trial using real-time medication monitoring. *Clinics and research in hepatology and gastroenterology* 2016;40:622-30.
40. Yang Z, Lu Y, Xu Q, Chen X. Virologic responses and tolerance of peginterferon alfa plus ribavirin treatment for patients with chronic hepatitis C virus infection in different age categories. *Nigerian journal of clinical practice* 2016;19:133-9.
41. Malnick SD, Basevitch A. Peginterferon alfa-2b therapy in acute hepatitis C: impact of onset of therapy on sustained virologic response. *Gastroenterology* 2006;131:683; author reply -4.
42. Xia YH, Chen W, Tucker JD, Wang C, Ling L. HIV and hepatitis C virus test uptake at methadone clinics in Southern China: opportunities for expanding detection of bloodborne infections. *BMC public health* 2013;13:899.
43. Huan Z, Fuzhi W, Lu L, Min Z, Xingzhi C, Shiyang J. Comparisons of Adherence to Antiretroviral Therapy in a High-Risk Population in China: A Systematic Review and Meta-Analysis. *PloS one* 2016;11:e0146659.
44. Zhao Y, Shi CX, McGoogan JM, Rou K, Zhang F, Wu Z. Predictors of accessing antiretroviral therapy among HIV-positive drug users in China's National Methadone Maintenance Treatment Programme. *Addiction (Abingdon, England)* 2015;110 Suppl 1:40-50.
45. Mellors JW, Munoz A, Giorgi JV, Margolick JB, Tassoni CJ, Gupta P, Kingsley LA, Todd JA, Saah AJ, Detels R, Phair JP, Rinaldo CR, Jr. Plasma viral load and CD4+ lymphocytes as prognostic markers of HIV-1 infection. *Annals of internal medicine* 1997;126:946-54.

46. Deng L, Zou X, Chen W, Xia Y, Liu Y, Ling L. How clients' during-treatment motivations relate to their perceptions and impressions of methadone maintenance treatment: A multilevel analysis of a cross-sectional survey in Guangdong Province, China. *Drug and alcohol dependence* 2016;164:151-7.
47. Zou X, Ling L, Zhang L. Trends and risk factors for HIV, HCV and syphilis seroconversion among drug users in a methadone maintenance treatment programme in China: a 7-year retrospective cohort study. *BMJ open* 2015;5:e008162.
48. Liu Z, Qin X, Hu Z, Wu S, Xu X, Li L. The Effectiveness of Health Education on Chinese Drug Users: A Systematic Review and Meta-analysis. *Chinese Journal of Health Statistics* 2010;27:40-9.
49. Zhang B, Yang L, Wang H, Ji H, Xu Y, Wen Z, Li Y, Li J, Wang C. Effects of Psychological Counseling Intervention on Increasing Methadone Dosage and Reducing Heroin Use Among Patients Receiving Methadone Maintenance Treatment. *Chinese Journal of Epidemiology* 2015;36:832-5.
50. Chen W. Effectiveness and Health Economics Evaluation on Psychosocial and Behavioral Intervention among Community-based Methadone Maintenance Treatment. *Epidemiology and Medical Statistics*, Guangzhou: Sun Yat-sen University; 2013, p. 172.
51. Chen W, Hong Y, Zou X, McLaughlin MM, Xia Y, Ling L. Effectiveness of prize-based contingency management in a methadone maintenance program in China. *Drug and alcohol dependence* 2013;133:270-4.
52. Zhang Y, Tang Q, Wang W, Tan H. Meta-analysis on the Effect of Needle Exchange on Prevention and Control of HIV/AIDS Among Injecting Drug users. *Practical Preventive Medicine* 2011;18:1406-9.
53. Zhu J, Zhong B, Liu Y, Wang P, Wang S, Yan J, Ouyang S, Fu Z, Chen D, He P. The Preventive Effect of 100% Condom Use Programme (CUP) for Sexually Transmitted Disease Among Outpatients Receiving Methadone Maintenance Treatment. *Chinese Journal of Disease Control and Prevention* 2012;16:130-2.
54. Harris KA, Jr., Arnsten JH, Litwin AH. Successful integration of hepatitis C evaluation and treatment services with methadone maintenance. *Journal of addiction medicine* 2010;4:20-6.
